# Supplementary material
Source: publisher figshare collection journal article supplement (https://gsajournals.figshare.com/ndownloader/files/30643017)
Supplement: Supplementary file 1 [file 30643017]

## Sheet:  psRNATargetJob-15833520
miRNA_acc.	Target location	Target_function	Expectation	UPE$	miRNA_start	miRNA_end	Target_start	Target_end	miRNA_aligned_fragment	alignment	Target_aligned_fragment	Inhibition	Target_Desc.	Multiplicity
Candidate10_5p	chr7:57016016-57016799	PREDICTED: Aegilops tauschii subsp. tauschii uncharacterized LOC109732497 (LOC109732497)	4.5	-1	1	21	391	411	ACGGCGGCGGCGACGUGGAGC	:. . :::::::::::.:	UAUUGGGGUCGCCGCCGCUGG	Cleavage		1
Candidate10_5p	chr5:438849602-438852045	Putative disease resistance protein RXW24L [Aegilops tauschii]	5	-1	1	21	425	445	ACGGCGGCGGCGACGUGGAGC	.::. : :: .::::::.::	UUUCUCCUUCAUCGCCGCUGU	Translation		1
Candidate11_3p	chr5:450319124-450321114	Disease resistance protein RPM1 [Aegilops tauschii]	3.5	-1	1	21	1574	1594	CGAAGGAUUUGCAGAUACUCC	:::: :: ::::::::::: :	GGAGGAUGUGCAAAUCCUUGG	Cleavage		1
Candidate11_5p	chr3:71168839-71169265	Unknown	4	-1	1	21	33	53	AGUCUCUGCCAAUUCUUCGUG	.:::.:. ::::.::.::.:	GGCGAGGGUUUGGUAGGGAUU	Cleavage		1
Candidate2_3p	chr1:13528447-13530329	Disease resistance RPP8-like protein 3 [Aegilops tauschii]	3	-1	1	21	1473	1493	UCCACUUCUGGUUCCACUUCU	.:::: :.::.::.:::::	GAGAGUGCAGCCGGAGGUGGA	Cleavage		1
Candidate2_3p	chr7:3373734-3375161	Disease resistance protein RPP13 [Aegilops tauschii]	5	-1	1	21	120	140	UCCACUUCUGGUUCCACUUCU	: : ::::::::..:: :.	UCAUGAGGAACCAGGGGUAGG	Cleavage		1
Candidate5_5p	chr6:4643370-4645276	Disease resistance RPP13-like	5	-1	1	21	504	524	UUUUUUGAUCCUUAGGAUGGC	:::: :::::::::.:	UUAUACCUAUGGAUCAAAAGA	Cleavage		1
Candidate9_5p	chr7:3373734-3375161	Disease resistance protein RPP13 [Aegilops tauschii]	4.5	-1	1	21	935	955	UAACUGACGCGAGGAGACAAG	:::.: :.:.:::::::.	UCUGUUUGGUUGUGUCAGUUG	Cleavage		1
miR156a_3p	chr5:14867756-14869540	Disease resistance protein RPM1 [Aegilops tauschii]	5	-1	1	20	1755	1774	UGACAGAAGAGAGUGAGCAC	:::::.:. .::.::::.	UAGCUCAUUUGUUUUUGUCG	Translation		1
miR156a_3p	chr2:190764649-190767470	Unknown	5	-1	1	20	1291	1310	UGACAGAAGAGAGUGAGCAC	: ::: .:::::::: ::	CUUCUCUUUCUCUUCUCUCU	Cleavage		1
miR156b_3p	chr5:14867756-14869540	Disease resistance protein RPM1 [Aegilops tauschii]	5	-1	1	20	1755	1774	UGACAGAAGAGAGUGAGCAC	:::::.:. .::.::::.	UAGCUCAUUUGUUUUUGUCG	Translation		1
miR156b_3p	chr2:190764649-190767470	Unknown	5	-1	1	20	1291	1310	UGACAGAAGAGAGUGAGCAC	: ::: .:::::::: ::	CUUCUCUUUCUCUUCUCUCU	Cleavage		1
miR156b_5p	chr4:68102433-68103368	Disease resistance protein RPM1 [Aegilops tauschii]	5	-1	1	22	744	764	GCUCACUGCUCUUCCUGUCAUC	:::: ::::.::.: ::::	GCCGACACGAAGGGCGG-GAGC	Cleavage		1
miR160_3p	chr5:536843815-536846718	Aegilops tauschii subsp. tauschii probable disease resistance protein At1g61300 (LOC109765182)	5	-1	1	21	1197	1217	CAUUGAGGGAGUCAUGCAGGC	.: : :::.:.:.:::::	AAUUUCUUGAUUUCUUCAAUU	Cleavage		1
miR164a_3p	chr2:619643427-619646162	Disease resistance protein RPP13 [Aegilops tauschii]	4	-1	1	21	1580	1600	UGGAGAAGCAGGGCACGUGCA	: :: :.:::::::.:::	GACUCGAGUCCUGCUUUUCCC	Cleavage		1
miR164a_3p	chr7:9900700-9902365	Disease resistance protein RPM1 [Aegilops tauschii]	5	-1	1	21	1207	1227	UGGAGAAGCAGGGCACGUGCA	..: ::::.:::::: ::	GAUGCCUGCCUUGCUUCACCU	Cleavage		1
miR164a_5p	chr6:4643370-4645276	Disease resistance RPP13-like	4.5	-1	1	21	1018	1038	CAUGUGCCUUUCUUCUCCACC	:: : : :.:.::::::::	ACUGAACAUGGAGGGCACAUG	Cleavage		1
miR164a_5p	chr7:57021205-57022525	PREDICTED: Aegilops tauschii subsp. tauschii alpha-1,2-galactosyltransferase gmh3-like (LOC109770880)	4.5	-1	1	21	150	170	CAUGUGCCUUUCUUCUCCACC	::.::::..:: .:::::	AUGGGGGAAGGGAGUUACAUG	Cleavage		1
miR164b_3p	chr2:619643427-619646162	Disease resistance protein RPP13 [Aegilops tauschii]	4	-1	1	21	1580	1600	UGGAGAAGCAGGGCACGUGCA	: :: :.:::::::.:::	GACUCGAGUCCUGCUUUUCCC	Cleavage		1
miR164b_3p	chr7:9900700-9902365	Disease resistance protein RPM1 [Aegilops tauschii]	5	-1	1	21	1207	1227	UGGAGAAGCAGGGCACGUGCA	..: ::::.:::::: ::	GAUGCCUGCCUUGCUUCACCU	Cleavage		1
miR164b_5p	chr7:175350464-175351113	predicted protein [Hordeum vulgare subsp. vulgare]	4	-1	1	21	29	49	CACGUGUUCUUCUCCUCCAUC	::::::.::::.: : :::	AUUGGAGGGGAAGGAAAGGUG	Cleavage		1
miR164c_5p	chr2:619643427-619646162	Disease resistance protein RPP13 [Aegilops tauschii]	4	-1	1	20	1581	1600	UGGAGAAGCAGGGCACGUGC	: :: :.:::::::.:::	ACUCGAGUCCUGCUUUUCCC	Cleavage		1
miR164c_5p	chr7:9900700-9902365	Disease resistance protein RPM1 [Aegilops tauschii]	5	-1	1	20	1208	1227	UGGAGAAGCAGGGCACGUGC	..: ::::.:::::: ::	AUGCCUGCCUUGCUUCACCU	Cleavage		1
miR166a_3p	chr7:9900700-9902365	Disease resistance protein RPM1 [Aegilops tauschii]	4.5	-1	1	21	1525	1545	GGAAUGUUGUCUGGUUCAAGG	:::: ::::..::: :::	GAAUGAAGCAGAUGACAAUCC	Cleavage		1
miR166a_5p	chr2:10715830-10717783	Disease resistance protein RPM1 [Aegilops tauschii]	4.5	-1	1	21	1135	1155	UCGGACCAGGCUUCAUUCCCC	.:::.:::::::.:::	GAUAUGUGAGGCCUGGUUCGA	Cleavage		1
miR166b_3p	chr1:89369435-89370740	predicted protein [Hordeum vulgare subsp. vulgare]	5	-1	1	21	681	701	GGAAUGUUGUCUGGUUGGAGA	::::::.:. :.::.::::.	UCUCCAGCUUGGCAGCAUUUG	Cleavage		1
miR166b_5p	chr2:10715830-10717783	Disease resistance protein RPM1 [Aegilops tauschii]	4.5	-1	1	21	1135	1155	UCGGACCAGGCUUCAUUCCCC	.:::.:::::::.:::	GAUAUGUGAGGCCUGGUUCGA	Cleavage		1
miR166c_3p	chr7:9900700-9902365	Disease resistance protein RPM1 [Aegilops tauschii]	3.5	-1	1	21	1525	1545	GGGUUGUUGUCUGGUUCAAGG	:::: ::::..::::.::	GAAUGAAGCAGAUGACAAUCC	Cleavage		1
miR166c_5p	chr2:10715830-10717783	Disease resistance protein RPM1 [Aegilops tauschii]	5	-1	1	21	1135	1155	UCGGACCAGGCUUCAAUCCCU	:::.:::::::.:::	GAUAUGUGAGGCCUGGUUCGA	Cleavage		1
miR166d_3p	chr1:482003481-482005623	Disease resistance RPP13-like	5	-1	1	21	1744	1764	GGUAUGUUGUCUGGCUCGGUG	..: .: :::::.::.::.:	UGCAUGGACAGACGACGUAUC	Cleavage		1
miR166d_5p	chr2:10715830-10717783	Disease resistance protein RPM1 [Aegilops tauschii]	4.5	-1	1	21	1135	1155	UCGGACCAGGCUUCAUUCCCU	.:::.:::::::.:::	GAUAUGUGAGGCCUGGUUCGA	Cleavage		1
miR167a_3p	chr7:8805433-8805839	Disease resistance RPP13-like protein 4 [Aegilops tauschii]	5	-1	1	21	302	322	AGGUCAUGUGGCAGCUUCAUU	::: .. ::::.:::::...:	AAUAGGCCUGCUACAUGGUUU	Cleavage		1
miR167a_3p	chr7:175350464-175351113	predicted protein [Hordeum vulgare subsp. vulgare]	5	-1	1	21	579	599	AGGUCAUGUGGCAGCUUCAUU	:: : :.:::..::::: ::	CAUAAUGUUGCUGCAUGAACU	Cleavage		1
miR167d_3p	chr5:536003413-536005383	Disease resistance protein RPM1 [Aegilops tauschii]	5	-1	1	21	54	73	AGAUCAUGCUGCAGCUUCAUU	:::::: ::::::: ::::	CAUGAAG-UGCAGCAGCAUCU	Cleavage		1
miR167d_3p	chr2:190764649-190767470	Unknown	5	-1	1	21	1143	1162	AGAUCAUGCUGCAGCUUCAUU	::::::: :::::.:: .:.:	AAUGAAG-UGCAGUAUUGUUU	Cleavage		1
miR169b_3p	chr5:7234634-7235803	Disease resistance protein RGA2 [Aegilops tauschii]	4.5	-1	1	23	318	340	UAGCCAAGGAUGAUUUGCCUGUG	.:. :::::. :: ::::::::	UAUUGGCAAGACAACCUUGGCUC	Translation		1
miR169c_3p	chr5:7234634-7235803	Disease resistance protein RGA2 [Aegilops tauschii]	4.5	-1	1	22	319	340	UAGCCAAGGAUGAUUUGCCUGU	:. :::::. :: ::::::::	AUUGGCAAGACAACCUUGGCUC	Translation		1
miR169d_3p	chr5:7234634-7235803	Disease resistance protein RGA2 [Aegilops tauschii]	4.5	-1	1	23	318	340	UAGCCAAGGAUGAUUUGCCUGUG	.:. :::::. :: ::::::::	UAUUGGCAAGACAACCUUGGCUC	Translation		1
miR171a_5p	chr5:536003413-536005383	Disease resistance protein RPM1 [Aegilops tauschii]	5	-1	1	21	703	723	UAUUGGCUCGGCUCACUCAGG	:: :::::::: :::: ..::	CCAGAGUGAGCAGAGCGGGUA	Translation		1
miR171b_3p	chr2:30165533-30167550	Disease resistance protein RPM1 [Triticum urartu]	4	-1	1	21	1880	1900	CGAUAUUGGUGAGGUUCAAUC	:.: :. :.::.:.:::::::	GGUGGGUCUUCGCUAAUAUCG	Cleavage		1
miR171b_3p	chr2:30231685-30233309	Disease resistance RPP13-like	4	-1	1	21	1487	1507	CGAUAUUGGUGAGGUUCAAUC	:.: :. :.::.:.:::::::	GGUGGGUCUUCGCUAAUAUCG	Cleavage		1
miR171b_3p	chr5:438849602-438852045	Putative disease resistance protein RXW24L [Aegilops tauschii]	5	-1	1	21	1805	1825	CGAUAUUGGUGAGGUUCAAUC	:::: :.:: .::::::.	UCUUGAUCUUCCUCAAUAUUU	Translation		1
miR390_5p	chr2:449078300-449078985	Triticum aestivum clone CI4-C siRNA (TAS3b) gene (AtaTscTAS3-3)	2.5	-1	1	21	436	456	AAGCUCAGGAGGGAUAGCGCC	:::::::::.:::::::	CCGUCUAUCCCUCUUGAGCUU	Cleavage		2
miR390_5p	chr2:449078300-449078985	Triticum aestivum clone CI4-C siRNA (TAS3b) gene (AtaTscTAS3-3)	4	-1	1	21	225	245	AAGCUCAGGAGGGAUAGCGCC	::: ::::::. ::::::::	GGCUCUAUCCUCCCUGAGCUC	Translation		2
miR393_3p	chr1:89369435-89370740	predicted protein [Hordeum vulgare subsp. vulgare]	3	-1	1	21	660	680	CAGUGCAAUCCCUUUGGAAUU	::::::::::: :::.::	ACAUCCAAAGGGAUCGCAUUG	Cleavage		1
miR393_3p	chr2:1859860-1862422	Disease resistance RPP13-like	4.5	-1	1	21	685	706	CAGUGCAAUCCCUUUGGA-AUU	::: ::..:::::::::::.:	AAUCUCUGAAGGGAUUGCAUUC	Cleavage		1
miR393_5p	chr1:12617094-12619113	RGA1c [Aegilops tauschii]	5	-1	1	21	1440	1459	UUCCAAAGGGAUCGCAUUGAU	: :.::: ::::.::: :::.	ACCGAUG-GAUCUCUUGGGAG	Cleavage		1
miR396a_3p	chr2:156858881-156859875	Disease resistance protein RPM1 [Aegilops tauschii]	5	-1	1	21	517	537	GUUCAAGAAAGCCCAUGGAAA	.::::: ::::::::..	AGGUCAUGGUCUUUCUUGGGG	Cleavage		1
miR396a_5p	chr7:15786885-15788430	PREDICTED: Aegilops tauschii subsp. tauschii alpha-1,2-galactosyltransferase gmh3-like (LOC109732496)	5	-1	1	21	1076	1096	UCCACAGGCUUUCUUGAACUG	.:::: ::.::::::: :	GGGUUCUUGAGAGCCUGUCGU	Cleavage		1
miR398b_5p	chr5:7234634-7235803	Disease resistance protein RGA2 [Aegilops tauschii]	5	-1	1	21	130	149	AGGGUCGAACUGAGAACACAU	::::: :::::::::. :	CAGUGUU-UCAGUUCGAUGCC	Cleavage		1
miR399a_3p	chr7:3670812-3672578	Disease resistance protein RPP13 [Aegilops tauschii]	5	-1	1	21	101	121	GGGCUCCUCUUUAUUGGCAGG	::::: ::..::: :::: :	GCUGCCCAUGGAGAUGAGCAC	Cleavage		1
miR399b_3p	chr6:22372727-22373264	hypothetical protein F775_17496 [Aegilops tauschii]	4.5	-1	1	21	190	210	GUGCAGUUCUCCUCUGGCAUG	:: :::: :::.:: ::::	GUUGGCAGAAGAGGACGGCAC	Cleavage		1
miR5200a_3p	chr5:450319124-450321114	Disease resistance protein RPM1 [Aegilops tauschii]	4.5	-1	1	21	1219	1239	AGAUACUCCCCAAGGCUUGGG	::::. :::: ::: ::::	UGCAAGUGUUGGAGAGGAUCU	Cleavage		1
miR5718_5p	chr5:536003413-536005383	Disease resistance protein RPM1 [Aegilops tauschii]	5	-1	1	21	200	220	UGGUCUGUGUUUGUUUCAAAC	: :::.:::.:..: :.::	AAUGGAAGCAAGCGUACAUCA	Cleavage		1
miR5718_5p	chr1:79355934-79357477	Disease resistance RPP13-like protein 4 [Aegilops tauschii]	5	-1	1	21	162	182	UGGUCUGUGUUUGUUUCAAAC	::: : :::.:::::::	AGUUGCACAAAAUACAGACCU	Cleavage		1
miR6201_5p	chr5:572496450-572497287	Lysine-specific demethylase 5B [Aegilops tauschii]	5	-1	1	22	629	650	UGACCCUGAGGCACUCAUACCG	: : :::: :::::: ::::	AGCUUUGAGAGCCUCAAGGUCU	Cleavage		1
miR827_3p	chr5:536843815-536846718	Aegilops tauschii subsp. tauschii probable disease resistance protein At1g61300 (LOC109765182)	4.5	-1	1	22	1268	1289	UUUUGUUGGUUGUCAUCUAACC	:.::: : :.::::::..:	GCAUGGAUUAGAGCCAACAGGA	Cleavage		1
miR827_3p	chr5:113196062-113197878	Disease resistance RPP13-like	4.5	-1	1	22	75	96	UUUUGUUGGUUGUCAUCUAACC	: :: :.::.:::.::::	UCCUCGAGAAUAAUCAAUAAAA	Cleavage		1
miR827_3p	chr1:13528447-13530329	Disease resistance RPP8-like protein 3 [Aegilops tauschii]	5	-1	1	22	19	40	UUUUGUUGGUUGUCAUCUAACC	::::::::: .:::::	GUAAUAAUGACAACCCGCAAAA	Cleavage		1
miR827_3p	chr7:57021205-57022525	PREDICTED: Aegilops tauschii subsp. tauschii alpha-1,2-galactosyltransferase gmh3-like (LOC109770880)	5	-1	1	22	118	139	UUUUGUUGGUUGUCAUCUAACC	::: .:::...::::::	UAUGUGAUUGCAAUUGACAAAA	Cleavage		1
miR9656_3p	chr6:4643370-4645276	Disease resistance RPP13-like	5	-1	1	21	1007	1027	AUUGUUCAGUGUUUCGAAGGA	:.::: :.::::::::::	UUCUUGCAGACACUGAACAUG	Cleavage		1
miR9656_5p	chr1:89369435-89370740	predicted protein [Hordeum vulgare subsp. vulgare]	5	-1	1	21	743	763	CUUCGAGACUCUGAACAGCGG	.: :::::.::::.: ::	AGCUUCUUCAGGGUCUUGCAG	Cleavage		1
miR9674b_3p	chr5:450319124-450321114	Disease resistance protein RPM1 [Aegilops tauschii]	5	-1	1	21	289	309	GUAGGAUGGCUGGUGCUAUGG	..:: ::..:::::::::	GUGUACCAUUAGCCAUCCUUA	Cleavage		1
miR9674b_3p	chr1:89369435-89370740	predicted protein [Hordeum vulgare subsp. vulgare]	5	-1	1	21	355	374	GUAGGAUGGCUGGUGCUAUGG	::: : :::::::: :.::::	CCA-ACCACCAGCCUUUCUAC	Cleavage		1
miR9674b_5p	chr5:572496450-572497287	Lysine-specific demethylase 5B [Aegilops tauschii]	4.5	-1	1	21	395	415	AUAGCAUCAUCCAUCCUACCA	::::: ::::.::::: ::	AGGUAGUAUGGGUGAUGAAAU	Cleavage		1
miR9674c_3p	chr5:450319124-450321114	Disease resistance protein RPM1 [Aegilops tauschii]	5	-1	1	21	289	309	GUAGGAUGGCUGGUGCUAUGG	..:: ::..:::::::::	GUGUACCAUUAGCCAUCCUUA	Cleavage		1
miR9674c_3p	chr1:89369435-89370740	predicted protein [Hordeum vulgare subsp. vulgare]	5	-1	1	21	355	374	GUAGGAUGGCUGGUGCUAUGG	::: : :::::::: :.::::	CCA-ACCACCAGCCUUUCUAC	Cleavage		1
miR9674c_5p	chr5:572496450-572497287	Lysine-specific demethylase 5B [Aegilops tauschii]	4.5	-1	1	21	395	415	AUAGCAUCAUCCAUCCUACCA	::::: ::::.::::: ::	AGGUAGUAUGGGUGAUGAAAU	Cleavage		1
miR9674d_3p	chr5:450319124-450321114	Disease resistance protein RPM1 [Aegilops tauschii]	5	-1	1	21	289	309	GUAGGAUGGCUGGUGCUAUGG	..:: ::..:::::::::	GUGUACCAUUAGCCAUCCUUA	Cleavage		1
miR9674d_3p	chr5:450319124-450321114	Disease resistance protein RPM1 [Aegilops tauschii]	5	-1	1	21	289	309	GUAGGAUGGCUGGUGCUAUGG	..:: ::..:::::::::	GUGUACCAUUAGCCAUCCUUA	Cleavage		1
miR9674d_3p	chr1:89369435-89370740	predicted protein [Hordeum vulgare subsp. vulgare]	5	-1	1	21	355	374	GUAGGAUGGCUGGUGCUAUGG	::: : :::::::: :.::::	CCA-ACCACCAGCCUUUCUAC	Cleavage		1
miR9674d_3p	chr1:89369435-89370740	predicted protein [Hordeum vulgare subsp. vulgare]	5	-1	1	21	355	374	GUAGGAUGGCUGGUGCUAUGG	::: : :::::::: :.::::	CCA-ACCACCAGCCUUUCUAC	Cleavage		1
miR9674d_5p	chr5:572496450-572497287	Lysine-specific demethylase 5B [Aegilops tauschii]	4.5	-1	1	21	395	415	AUAGCAUCAUCCAUCCUACCA	::::: ::::.::::: ::	AGGUAGUAUGGGUGAUGAAAU	Cleavage		1
miR9674d_5p	chr5:572496450-572497287	Lysine-specific demethylase 5B [Aegilops tauschii]	4.5	-1	1	21	395	415	AUAGCAUCAUCCAUCCUACCA	::::: ::::.::::: ::	AGGUAGUAUGGGUGAUGAAAU	Cleavage		1
miR9674e_3p	chr5:450319124-450321114	Disease resistance protein RPM1 [Aegilops tauschii]	5	-1	1	21	289	309	GUAGGAUGGCUGGUGCUAUGG	..:: ::..:::::::::	GUGUACCAUUAGCCAUCCUUA	Cleavage		1
miR9674e_3p	chr1:89369435-89370740	predicted protein [Hordeum vulgare subsp. vulgare]	5	-1	1	21	355	374	GUAGGAUGGCUGGUGCUAUGG	::: : :::::::: :.::::	CCA-ACCACCAGCCUUUCUAC	Cleavage		1
miR9674e_5p	chr5:572496450-572497287	Lysine-specific demethylase 5B [Aegilops tauschii]	4.5	-1	1	21	395	415	AUAGCAUCAUCCAUCCUACCA	::::: ::::.::::: ::	AGGUAGUAUGGGUGAUGAAAU	Cleavage		1
miR9676_3p	chr5:113196062-113197878	Disease resistance RPP13-like	5	-1	1	21	381	401	GGAUGUCAUCGUGGCCGUACA	:.:: .: .::::.:.:::	ACUGCGCUCUUGAUGGCGUCC	Cleavage		1
miR9676_3p	chr1:89369435-89370740	predicted protein [Hordeum vulgare subsp. vulgare]	5	-1	1	21	645	665	GGAUGUCAUCGUGGCCGUACA	:.: ::::: :::::::	UCAAUGAGCACGACGACAUCC	Cleavage		1
miR9676_5p	chr5:566566913-566568432	Disease resistance protein RPM1 [Aegilops tauschii]	4	-1	1	20	1425	1444	UACGGCCUGAUGACAUCCAC	:::::: ::::::.:::	GCCGAUGUCCUCAGGCUGUA	Translation		1
miR9676_5p	chr1:12617094-12619113	RGA1c [Aegilops tauschii]	5	-1	1	20	955	973	UACGGCCUGAUGACAUCCAC	: ::: :..::.:::.:::	CUUGAU-UUGUCGGGCUGUA	Cleavage		1
miR9679_3p	chr6:1997256-1998819	Unknown	4	-1	1	21	172	192	UCUGGUUUUAGAUGCGCUUCC	: :::. .::.:.:.:::.::	GCAAGUUUAUUUGAGACCGGA	Cleavage		1
miR9679_3p	chr2:619643427-619646162	Disease resistance protein RPP13 [Aegilops tauschii]	5	-1	1	21	1075	1095	UCUGGUUUUAGAUGCGCUUCC	::: ::.:.::.:.. :::	AUAAGAGCGUUUAGAGUAAGA	Cleavage		1
miR9776_5p	chr5:438849602-438852045	Putative disease resistance protein RXW24L [Aegilops tauschii]	3.5	-1	1	21	1053	1073	UGGACGAGGAUGUGCAGCUGC	::::::::::::.: :.:	CUUGCUGCACAUCCUUGACUA	Cleavage		1
miR9776_5p	chr5:113196062-113197878	Disease resistance RPP13-like	4.5	-1	1	21	1211	1231	UGGACGAGGAUGUGCAGCUGC	: .: :..:::.:.:::::	CAAUUUUCGUAUCUUUGUCCA	Cleavage		1
miR9776_5p	chr4:68102433-68103368	Disease resistance protein RPM1 [Aegilops tauschii]	5	-1	1	21	671	690	UGGACGAGGAUGUGCAGCUGC	: :::: :::.:::::: ::	GGAGCU-CACGUCCUCGACCC	Cleavage		1
miR9863a-3p	chr1:13528447-13530329	Disease resistance RPP8-like protein 3 [Aegilops tauschii]	1	-1	1	22	368	389	UGAGAAGGUAGAUCAUAAUAGC	:.::::: ::::::::::::::	GUUAUUACGAUCUACCUUCUCA	Cleavage		1
miR9863a-3p	chr5:450319124-450321114	Disease resistance protein RPM1 [Aegilops tauschii]	1.5	-1	1	22	442	463	UGAGAAGGUAGAUCAUAAUAGC	:::::::::::::::::::: :	GCUAUUAUGAUCUACCUUCUGA	Cleavage		1
miR9863a-3p	chr6:1997256-1998819	Unknown	2	-1	1	22	38	59	UGAGAAGGUAGAUCAUAAUAGC	:.:::::::::::::::: ::.	GUUAUUAUGAUCUACCUUGUCG	Cleavage		1
miR9863a-3p	chr2:30231685-30233309	Disease resistance RPP13-like	2.5	-1	1	22	86	107	UGAGAAGGUAGAUCAUAAUAGC	::::: :::::::::::: :::	GCUAUGAUGAUCUACCUUAUCA	Cleavage		1
miR9863a-3p	chr7:3373734-3375161	Disease resistance protein RPP13 [Aegilops tauschii]	2.5	-1	1	22	2	23	UGAGAAGGUAGAUCAUAAUAGC	:::: ::::::::::::: :::	GCUACUAUGAUCUACCUUGUCA	Cleavage		1
miR9863a-3p	chr1:12617094-12619113	RGA1c [Aegilops tauschii]	2.5	-1	1	22	461	482	UGAGAAGGUAGAUCAUAAUAGC	:::::::: ::::::: :::::	GCUAUUAUAAUCUACCCUCUCA	Cleavage		1
miR9863a-3p	chr2:30165533-30167550	Disease resistance protein RPM1 [Triticum urartu]	2.5	-1	1	22	479	500	UGAGAAGGUAGAUCAUAAUAGC	::::: :::::::::::: :::	GCUAUGAUGAUCUACCUUAUCA	Cleavage		2
miR9863a-3p	chr6:4643370-4645276	Disease resistance RPP13-like	3	-1	1	22	390	411	UGAGAAGGUAGAUCAUAAUAGC	:::::::::::::::::: ::	GCUAUUAUGAUCUACCUUACCA	Cleavage		1
miR9863a-3p	chr2:30165533-30167550	Disease resistance protein RPM1 [Triticum urartu]	4	-1	1	22	284	305	UGAGAAGGUAGAUCAUAAUAGC	:: :::::::: ::::::: :	GCCCUUAUGAUCAACCUUCUGA	Translation		2
miR9863a-3p	chr2:283004-285104	Disease resistance protein RPM1 [Aegilops tauschii]	5	-1	1	22	328	349	UGAGAAGGUAGAUCAUAAUAGC	::: ::: ::::. ::::.:	UAUAUGAUGCUCUAUGUUCUUA	Cleavage		1
miR9863a-5p	chr2:10715830-10717783	Disease resistance protein RPM1 [Aegilops tauschii]	4	-1	1	21	1515	1535	UGUUAUGAUCUGCUUCUCAUC	:. :.::::.::::::.:	AGGGGAAGGCAGGUCAUAAUA	Cleavage		1
miR9863a-5p	chr5:536003413-536005383	Disease resistance protein RPM1 [Aegilops tauschii]	4.5	-1	1	21	1822	1843	UGUUAUGAUCUG-CUUCUCAUC	::::::.:: :::::::::..:	GAUGAGGAGGCAGAUCAUAGUA	Cleavage		1
miR9863a-5p	chr1:12717474-12719374	Disease resistance protein RPP13 [Aegilops tauschii]	5	-1	1	21	1548	1569	UGUUAUGAUCUG-CUUCUCAUC	:::::::.: .::::.::::.:	GAUGAGAGGGUAGAUUAUAAUA	Cleavage		1
miR9863a-5p	chr5:438849602-438852045	Putative disease resistance protein RXW24L [Aegilops tauschii]	5	-1	1	21	2163	2184	UGUUAUGAUCUG-CUUCUCAUC	::: ::::: :::::::::..:	GAUCAGAAGGCAGAUCAUAGUA	Cleavage		1
miR9863a-5p	chr7:3670812-3672578	Disease resistance protein RPP13 [Aegilops tauschii]	5	-1	1	21	1635	1656	UGUUAUGAUCUG-CUUCUCAUC	:.::: ::: .:::::::::.:	GGUGACAAGGUAGAUCAUAAUA	Cleavage		1
miR9863b-3p	chr1:13528447-13530329	Disease resistance RPP8-like protein 3 [Aegilops tauschii]	1	-1	1	22	368	389	UGAGAAGGUAGAUCAUAAUAGC	:.::::: ::::::::::::::	GUUAUUACGAUCUACCUUCUCA	Cleavage		1
miR9863b-3p	chr5:450319124-450321114	Disease resistance protein RPM1 [Aegilops tauschii]	1.5	-1	1	22	442	463	UGAGAAGGUAGAUCAUAAUAGC	:::::::::::::::::::: :	GCUAUUAUGAUCUACCUUCUGA	Cleavage		1
miR9863b-3p	chr6:1997256-1998819	Unknown	2	-1	1	22	38	59	UGAGAAGGUAGAUCAUAAUAGC	:.:::::::::::::::: ::.	GUUAUUAUGAUCUACCUUGUCG	Cleavage		1
miR9863b-3p	chr2:30165533-30167550	Disease resistance protein RPM1 [Triticum urartu]	2.5	-1	1	22	479	500	UGAGAAGGUAGAUCAUAAUAGC	::::: :::::::::::: :::	GCUAUGAUGAUCUACCUUAUCA	Cleavage		2
miR9863b-3p	chr7:3373734-3375161	Disease resistance protein RPP13 [Aegilops tauschii]	2.5	-1	1	22	2	23	UGAGAAGGUAGAUCAUAAUAGC	:::: ::::::::::::: :::	GCUACUAUGAUCUACCUUGUCA	Cleavage		1
miR9863b-3p	chr1:12617094-12619113	RGA1c [Aegilops tauschii]	2.5	-1	1	22	461	482	UGAGAAGGUAGAUCAUAAUAGC	:::::::: ::::::: :::::	GCUAUUAUAAUCUACCCUCUCA	Cleavage		1
miR9863b-3p	chr2:30231685-30233309	Disease resistance RPP13-like	2.5	-1	1	22	86	107	UGAGAAGGUAGAUCAUAAUAGC	::::: :::::::::::: :::	GCUAUGAUGAUCUACCUUAUCA	Cleavage		1
miR9863b-3p	chr6:4643370-4645276	Disease resistance RPP13-like	3	-1	1	22	390	411	UGAGAAGGUAGAUCAUAAUAGC	:::::::::::::::::: ::	GCUAUUAUGAUCUACCUUACCA	Cleavage		1
miR9863b-3p	chr2:30165533-30167550	Disease resistance protein RPM1 [Triticum urartu]	4	-1	1	22	284	305	UGAGAAGGUAGAUCAUAAUAGC	:: :::::::: ::::::: :	GCCCUUAUGAUCAACCUUCUGA	Translation		2
miR9863b-3p	chr2:283004-285104	Disease resistance protein RPM1 [Aegilops tauschii]	5	-1	1	22	328	349	UGAGAAGGUAGAUCAUAAUAGC	::: ::: ::::. ::::.:	UAUAUGAUGCUCUAUGUUCUUA	Cleavage		1
miR9863b-5p	chr2:10715830-10717783	Disease resistance protein RPM1 [Aegilops tauschii]	4	-1	1	21	1515	1535	UGUUAUGAUCUGCUUCUCAUC	:. :.::::.::::::.:	AGGGGAAGGCAGGUCAUAAUA	Cleavage		1
miR9863b-5p	chr5:536003413-536005383	Disease resistance protein RPM1 [Aegilops tauschii]	4.5	-1	1	21	1822	1843	UGUUAUGAUCUG-CUUCUCAUC	::::::.:: :::::::::..:	GAUGAGGAGGCAGAUCAUAGUA	Cleavage		1
miR9863b-5p	chr1:12717474-12719374	Disease resistance protein RPP13 [Aegilops tauschii]	5	-1	1	21	1548	1569	UGUUAUGAUCUG-CUUCUCAUC	:::::::.: .::::.::::.:	GAUGAGAGGGUAGAUUAUAAUA	Cleavage		1
miR9863b-5p	chr5:438849602-438852045	Putative disease resistance protein RXW24L [Aegilops tauschii]	5	-1	1	21	2163	2184	UGUUAUGAUCUG-CUUCUCAUC	::: ::::: :::::::::..:	GAUCAGAAGGCAGAUCAUAGUA	Cleavage		1
miR9863b-5p	chr7:3670812-3672578	Disease resistance protein RPP13 [Aegilops tauschii]	5	-1	1	21	1635	1656	UGUUAUGAUCUG-CUUCUCAUC	:.::: ::: .:::::::::.:	GGUGACAAGGUAGAUCAUAAUA	Cleavage		1
